# Supplementary material for: Cationic Lignin Polymers as Flocculant for Municipal Wastewater
Source: MDPI journal article supplement (doi:10.3390/polym13223871), 2021-11-09
Supplement: s1 [file s1]

## Supplementary materials

# Cationic lignin polymers as flocculant for municipal wastewater

Courtney Moore, Weijue Gao, and Pedram Fatehi \*

Green Processes Research Centre and Biorefining Research Institute, Lakehead University, Thunder Bay, ON P7B5E1, Canada; ctmoores@lakeheadu.ca (C.M.); wgao@lakeheadu.ca (W.G.)

\* Correspondence: pfatehi@lakeheadu.ca; Tel.: +1-807-343-8697; Fax: +1-807-346-7943

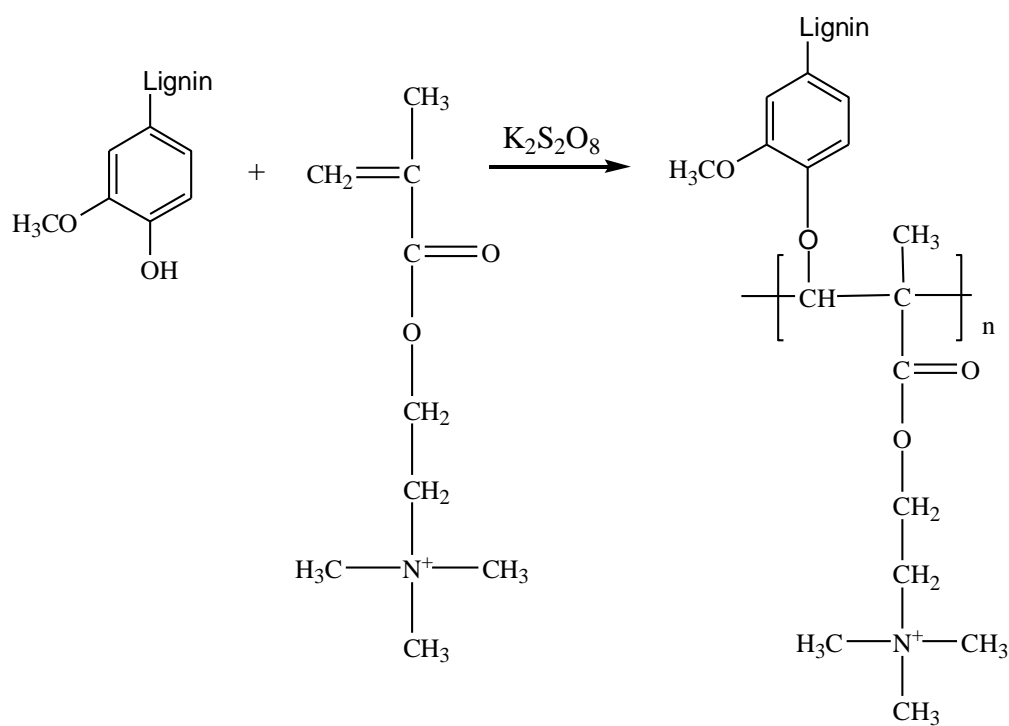

**Figure S1.** Polymerization reaction of kraft lignin and METAC [19].

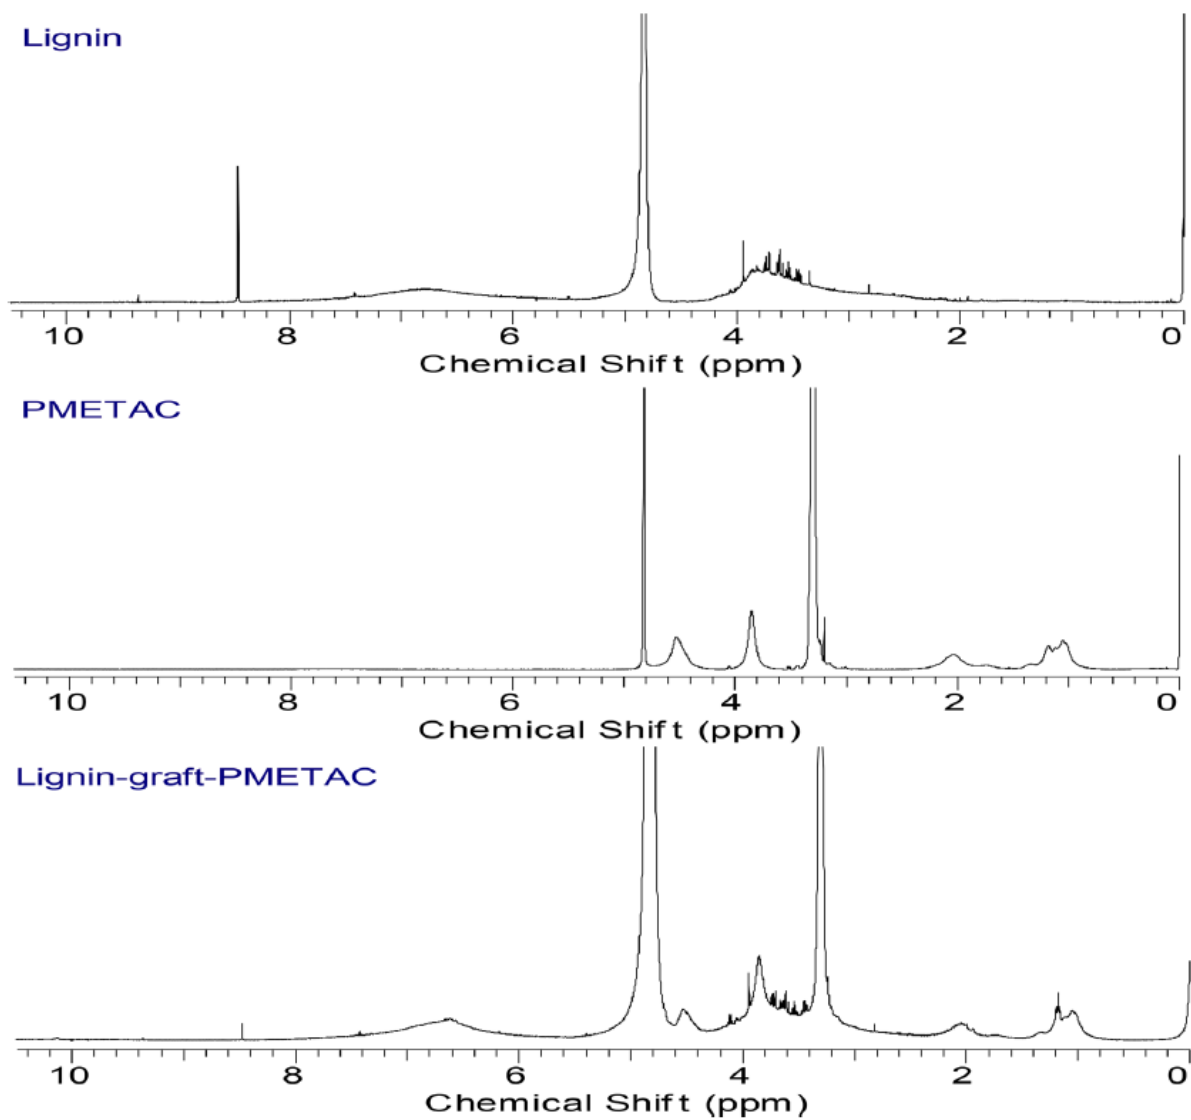

**Figure S2.**  $^1\text{H}$  NMR spectra of lignin, PMETAC, and lignin-graft -PMETAC [19].

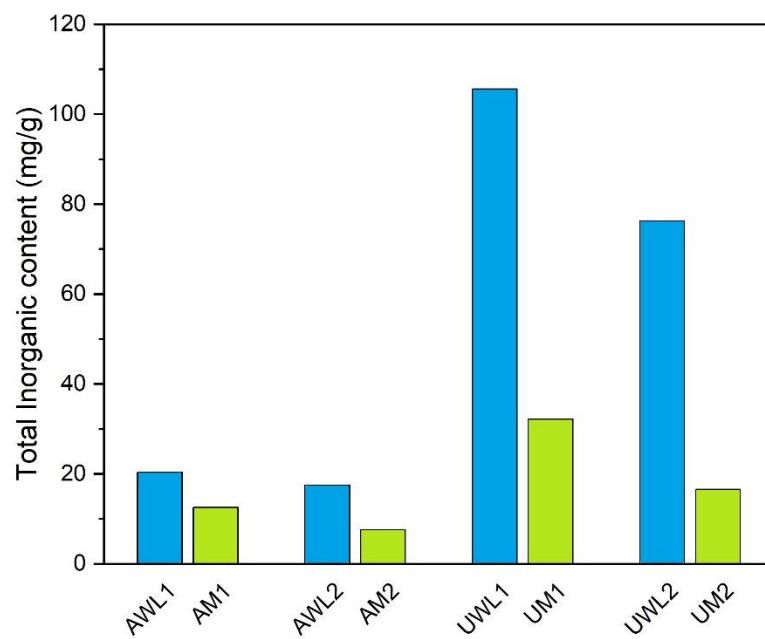

**Figure S3.** Comparison of total inorganic content of unmodified and modified lignin-METAC.

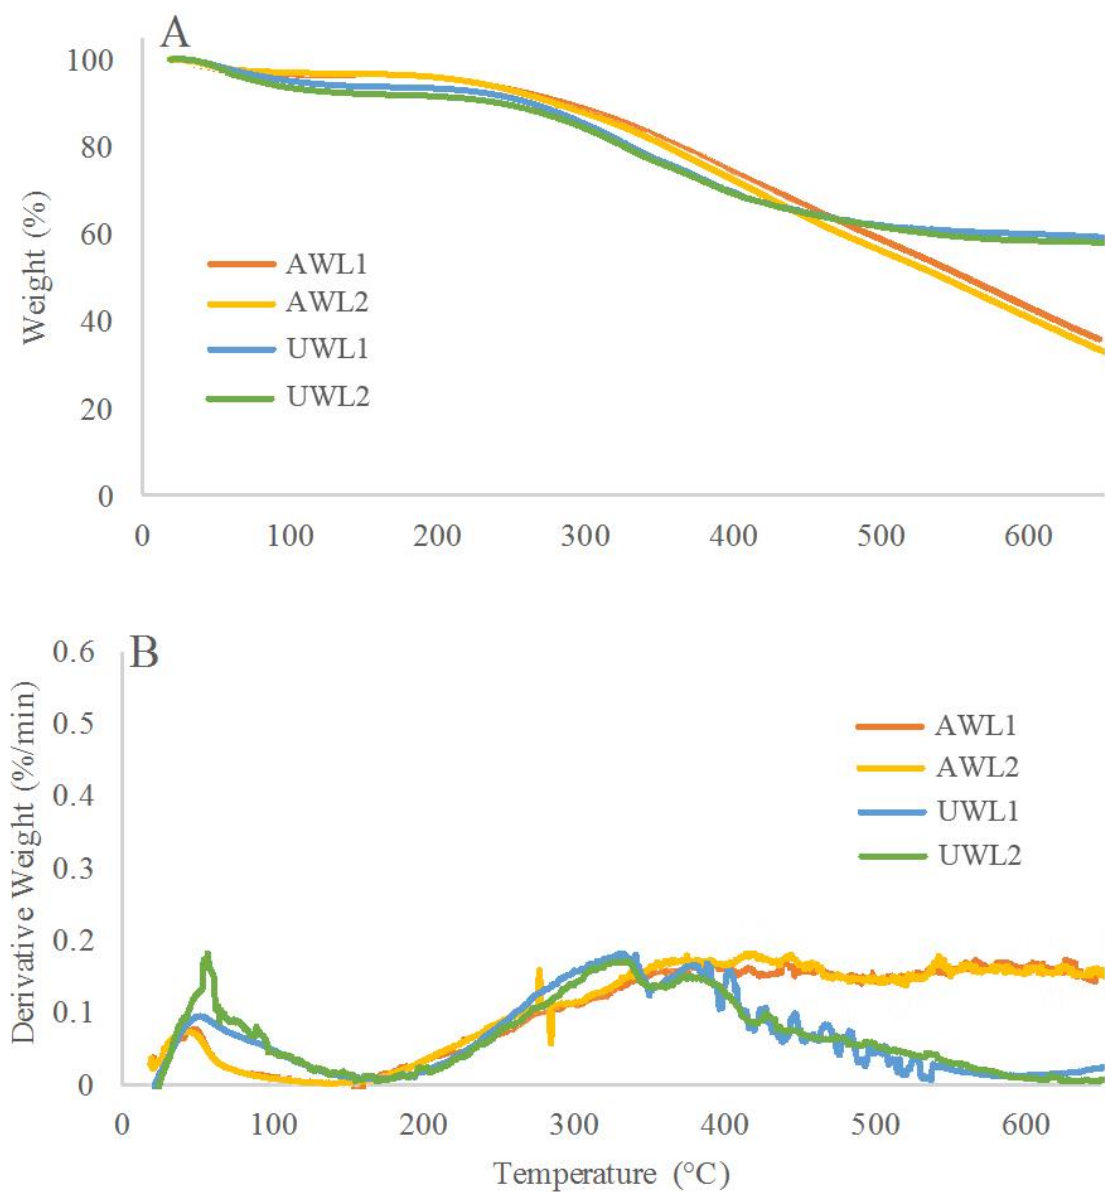

**Figure S4.** (A) Weight loss as a function of temperature, and (B) derivative weight loss as a function of temperature for unmodified lignin samples.

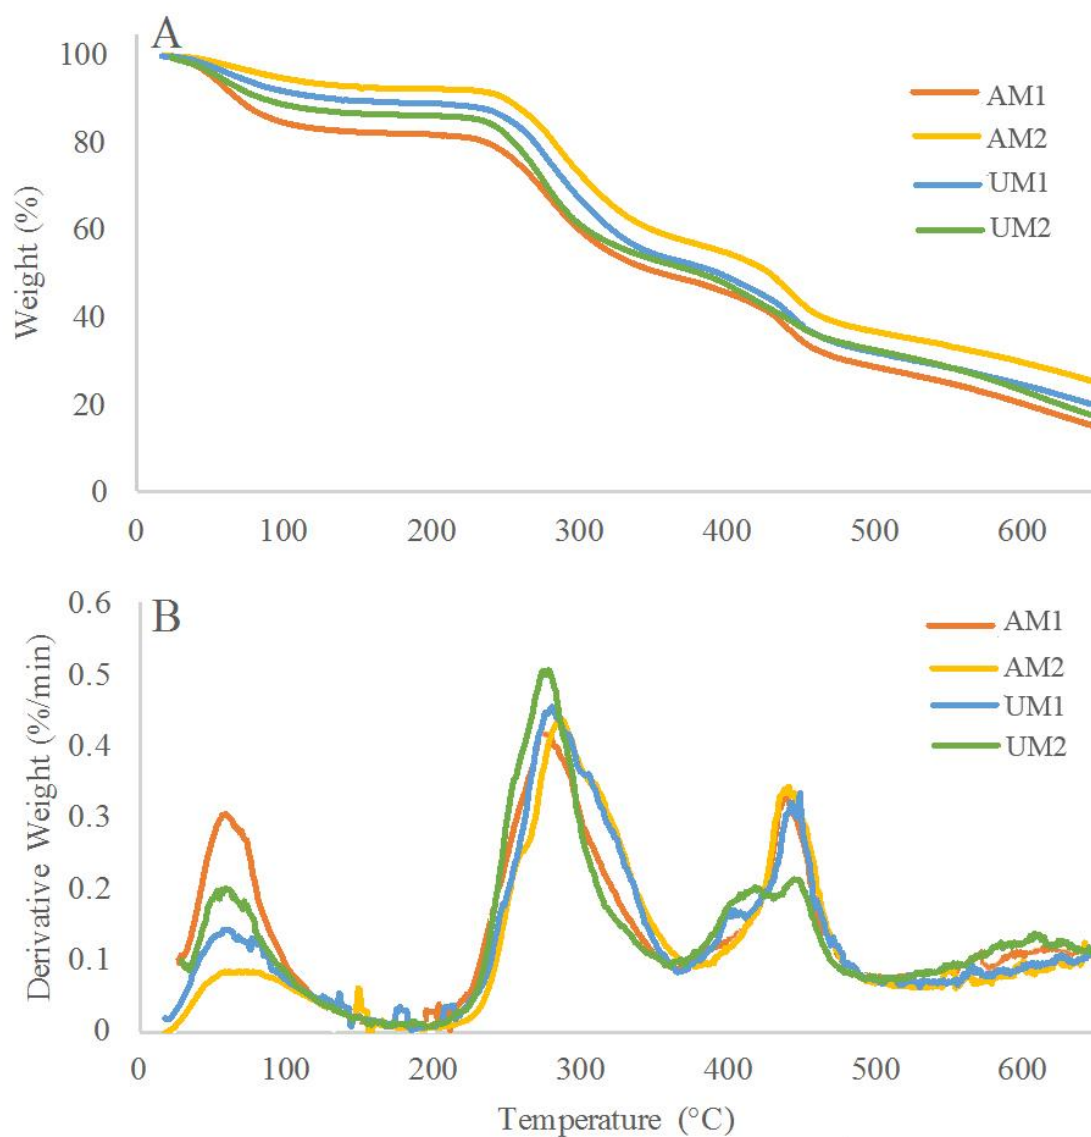

**Figure S5.** (A) Weight loss as a function of temperature, and (B) derivative weight loss as a function of temperature for lignin-METAC samples.

**Table S1.** Trace elemental analysis of unmodified lignin determined via ICP MS analysis

| <b>Inorganic Elements (µg/g)</b>  |           |           |                      |           |           |           |          |           |           |           |          |           |          |           |
|-----------------------------------|-----------|-----------|----------------------|-----------|-----------|-----------|----------|-----------|-----------|-----------|----------|-----------|----------|-----------|
|                                   | <b>Al</b> | <b>Ba</b> | <b>C<sub>a</sub></b> | <b>Cr</b> | <b>Cu</b> | <b>Fe</b> | <b>K</b> | <b>Mg</b> | <b>Mn</b> | <b>Na</b> | <b>S</b> | <b>Si</b> | <b>V</b> | <b>Zn</b> |
| <b>Unmodified</b>                 |           |           |                      |           |           |           |          |           |           |           |          |           |          |           |
| <b>AW</b>                         | 29        | 0.8       | 55                   | 1.0       | 1.2       | 33.       | 28       | 19.       | 5.2       | 3,05      | 16,7     | 27        | 0.7      | 2.3       |
| <b>L1</b>                         |           | 3         |                      | 3         | 3         | 6         | 9        | 4         |           | 2         | 20       | 0         | 9        | 7         |
| <b>AW</b>                         | 21        | <D        | 41                   | 0.8       | 1.5       | 9.7       | 17       | 10.       | 1.8       | 1,75      | 15,2     | 11        | 2.1      | 0.5       |
| <b>L2</b>                         |           | L         |                      | 6         | 2         |           | 7        | 7         |           | 4         | 16       | 7         | 1        | 3         |
| <b>UW</b>                         | 68        | 8.6       | 84                   | 0.8       | 0.9       | 38.       | 97       | 349       | 185       | 75,1      | 17,5     | 44        | 8.3      | 17.       |
| <b>L1</b>                         |           | 6         | 3                    | 0         | 5         | 1         | 72       | .7        | .4        | 44        | 36       | 7         | 1        | 86        |
| <b>UW</b>                         | 11        | 3.6       | 18                   | 0.2       | 1.3       | 58.       | 63       | 184       | 92.       | 53,7      | 15,2     | 11        | 1.7      | 10.       |
| <b>L2</b>                         | 8         | 4         | 4                    | 6         | 2         | 6         | 22       | .1        | 7         | 38        | 21       | 6         | 1        | 89        |
| <DL: below the Detectable Limits. |           |           |                      |           |           |           |          |           |           |           |          |           |          |           |
